# Supplementary material for: Dedifferentiated chondrosarcoma: Radiological features, prognostic factors and survival statistics in 23 patients
Source: PLoS One. 2017 Mar 16;12(3):e0173665. doi: 10.1371/journal.pone.0173665 (PMC5354284; doi:10.1371/journal.pone.0173665)
Supplement: S1 Dataset — (XLSX) [file pone.0173665.s002.xlsx]

## Sheet: Sheet1
case	sex	age	location	Symptoms	treatment	Margin of resection	grade of cartilaginous component	subtypes of dedifferentiation	Recurrence	Time to lung metastasis	Follow-up
1	M	69	Lt. prox. fem	Pain 6 m	EPR+c+r	wide	1	Spindle cell sarcoma	n	2 m	DOD 5 m
2	F	46	Rt.mid. hum	Mass 36 m	ERP	wide	1	Myofibroblastic sarcoma	n	n	AWD 60 m
3	F	65	Rt. prox .hum	Pain 1 m	EPR+c	wide	2	osteosarcoma	n	Initial;Liver 1 m	DOD 8 m
4	M	73	Lt.dist.femur	Pain 4 m	EPR+c	wide	1	osteosarcoma	11 m	12 m;multiple	DOD17 m
5	F	42	Lt.prox. hum	Pain 6 m	curettage +EPR	intralesional+wide	1	Spindle cell sarcoma	1 m	n	AWD19 m
6	M	32	Rt. finger	pa.fr	amputation	radical	1	Spindle cell sarcoma	n	n	AWD 18 m
7	F	36	Lt .prox .hum	pa.fr	EPR	wide	2	Spindle cell sarcoma	n	2 m	DOD 8 m
8	M	45	Rt. clavicle	Mass 36 m	EPR	wide	2	osteosarcoma	14 m	n	AWD 18 m
9	F	49	Lt .prox. Tibia;prox.fibula	Pain 24 m;mass 10 m	amputation	radical	1	osteosarcoma	n	n	AWD 67 m
10	F	36	Rt. pelvis	Pain 6 m	He+EPR+c	wide	2	osteosarcoma	n	n	AWD 27 m
11	F	42	Rt. pelvis	Pain 12 m	He+EPR+c	wide	2	osteosarcoma	24 m	n	DOD 32 m
12	F	59	Lt .pelvis	Pain 4 m	He+EPR	wide	1	osteosarcoma	n	initial	DOD 6 m
13	F	40	Rt. pelvis	Pain 12 m	He+EPR+c	marginal	1	Malignant fibrous histiocytoma	5 m	n	DOD 10 m
14	M	53	Rt. pelvis	Pain 6 m	He+amputation+c	radical	2	Malignant fibrous histiocytoma	n	Initial;Bone 2 m	DOD 5 m
15	M	58	Rt. pelvis	Pain 6 m;pa.fr	He+h.d	marginal	2	Malignant fibrous histiocytoma	1 m	1 m	DOD 2 m
16	M	50	Lt .pelvis	Pain5 m	He+h.d	wide	1	Spindle cell sarcoma	n	7 m	DOD 12 m
17	M	50	Lt .pelvis	Pain 12 m	He+amputation	radical	2	Spindle cell sarcoma	n	initial	DOD 5 m
18	M	56	Lt .pelvis	Pain 1 m	He+h.d	marginal	2	Spindle cell sarcoma	n	2 m;multiple	DOD 6 m
19	F	51	Lt .pelvis	Mass 12 m;pa.fr	n	n	1	Spindle cell sarcoma	n	initial	DOD 4 m
20	M	45	Lt .pelvis	Pain 2 m	He+EPR	wide	1	Spindle cell sarcoma	n	initial	DOD 9 m
21	F	61	Rt. pelvis	Pain 5 m	He+EPR	wide	2	Spindle cell sarcoma	n	n	DOD 29 m
22	M	50	Rt. pelvis	Pain 9 m	He+EPR	marginal	1	osteosarcoma	2 m	Initial;Brain(4 m)	DOD 7 m
23	M	51	T9-T11	Mass 5 m	EPR+c	marginal	2	Spindle cell sarcoma	2 m	initial	DOD 7 m
F, female; M, male; Lt, left; Rt, right; prox, proximal; dist, distal; fem, femur; hum, humerus; EPR, limb-salvage surgery with endoprosthetic replacement of resected bone; He, hemipelvectomy; c, chemotherapy; r, radiotherapy; m, months; DOD, died of disease. AWD; alive with disease; pa.fr, pathologic fracture; h.d. hip disarticulation; n, none.
